# Supplementary material for: Preventive oral health intervention among old home care clients
Source: Oxford University Press journal article supplement (doi:10.1093/ageing/afx020), 2017-01-30
Supplement: afx020Supplementary_Data.docx [file afx020Supplementary_Data.docx]

Supplementary Data

For Age and Ageing paper: *Preventive oral health intervention among old home care clients*

Table Appendix 1.Intervention programme

| Criteria for intervention | Intervention |
| --- | --- |
| Toothbrushing less than twice daily  Use of fluoride toothpaste less than twice daily  The presence of dental plaque on clinical examination  The presence of bleeding on probing on clinical examination | Intensifying mechanical plaque removal:  Recommending toothbrushing twice daily (in the morning before breakfast and in the evening prior going to bed), oral and written self-care instructions with pictures, recommending small soft toothbrush or electric toothbrush, recommending fluoride toothpaste 1100-1500 ppm  individual counselling and motivation |
| Interdental cleaning (dental floss, toothpick, interdental brush) less than once daily  The presence of dental plaque on clinical examination  The presence of bleeding on probing on clinical examination | Intensifying interdental mechanical plaque removal: recommending interdental cleaning once daily,  oral and written self-care instructions with pictures (interdental brush, toothpick),  individual counselling and motivation |
| Denture cleaning less than once daily  Overnight denture care in the mouth or in wet storage  The presence of denture plaque on clinical examination | Intensifying mechanical denture cleaning:  recommending denture cleaning at least once daily using suitable denture brush and denture cleaning agent or mild soap, written self-care instruction, individual counselling and motivation  No denture use at night, keeping dentures dry |
| Cleaning of oral mucosa by rinsing or using a gauze less than once daily | Intensifying oral mucosa cleaning |
